# Supplementary material for: Allergic Conjunctivitis-induced Retinal Inflammation Promotes Myopia Progression
Source: PubMed Central journal article supplement — eBioMedicine. 2018 Jan 31;28:274–86. doi: 10.1016/j.ebiom.2018.01.024 (PMC5835569; doi:10.1016/j.ebiom.2018.01.024), 2018-01-31

Supplementary table 1. Joint effects between allergic diseases in association with myopia in the case-control study population.

| AS | AD | AR | AC | Non-myopia group | Myopia group | Adjusted OR (95% CI) |
|----|----|----|----|------------------|--------------|----------------------|
| -  | -  | -  | -  | 93056            | 70708        | Ref.                 |
| +  | -  | -  | -  | 9538             | 7722         | 1.07 (1.03-1.10)     |
| -  | +  | -  | -  | 3523             | 3164         | 1.18 (1.13-1.24)     |
| -  | -  | +  | -  | 25375            | 26601        | 1.40 (1.37-1.42)     |
| -  | -  | -  | +  | 17251            | 23484        | 1.82 (1.78-1.86)     |
| +  | +  | -  | -  | 626              | 603          | 1.27 (1.13-1.42)     |
| +  | -  | +  | -  | 17108            | 17153        | 1.34 (1.31-1.37)     |
| +  | -  | -  | +  | 2160             | 2989         | 1.85 (1.75-1.96)     |
| -  | +  | +  | -  | 2298             | 2391         | 1.39 (1.31-1.47)     |
| -  | +  | -  | +  | 986              | 1533         | 2.08 (1.92-2.26)     |
| -  | -  | +  | +  | 10364            | 17692        | 2.30 (2.24-2.36)     |
| +  | +  | +  | -  | 3253             | 3209         | 1.32 (1.25-1.39)     |
| +  | +  | -  | +  | 193              | 326          | 2.25 (1.89-2.69)     |
| +  | -  | +  | +  | 7878             | 13360        | 2.29 (2.22-2.36)     |
| -  | +  | +  | +  | 1398             | 2500         | 2.41 (2.25-2.57)     |
| +  | +  | +  | +  | 2230             | 3802         | 2.31 (2.19-2.44)     |

Abbreviation: AS, asthma; AD, atopic dermatitis; AR, allergic rhinitis; AC, allergic conjunctivitis; OR, odds ratio; CI, confidence interval

Adjusted for sex, age, urbanization, and parents' occupational status

All  $p < 0.001$

## Supplementary Figure legend

Supplementary Figure 1: Allergic conjunctivitis increased the expression of myopia-related tissue-remodeling proteins. Immunofluorescence staining of TGF- $\beta$ , MMP2, and COL-I in negative, PBS-treated, and OVA-treated eyes are shown.

Supplementary Figure 2: TNF- $\alpha$ , IL-6, IL-8, and MCP-1 increased, while IL-10 down-regulated in allergic conjunctivitis eyes. Immunofluorescence staining of TNF- $\alpha$ , IL-6, IL-8, MCP-1, and IL-10 expressions in negative, PBS-treated, and OVA-treated eyes.

Supplementary Figure 3: NF $\kappa$ B and I $\kappa$ B increased in allergic conjunctivitis eyes. Immunofluorescence staining of NF $\kappa$ B and I $\kappa$ B expressions in negative, PBS-treated, and OVA-treated eyes.

Supplemental  
Figure 1

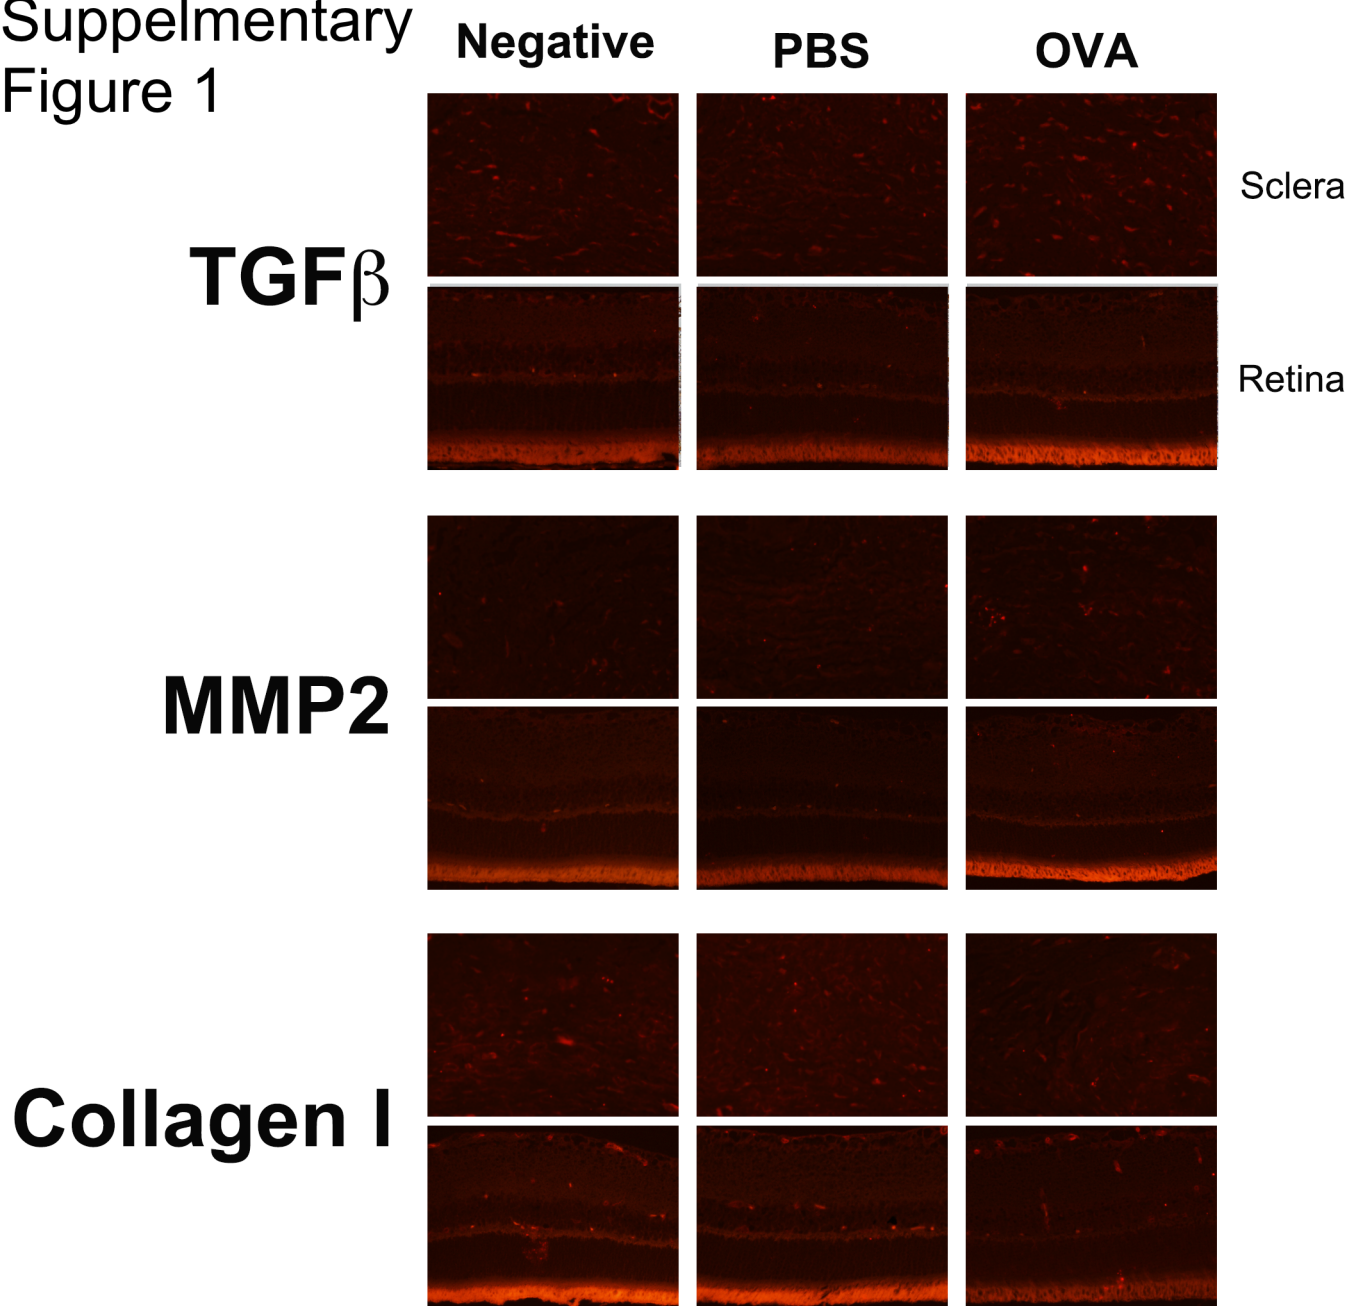

\* Scale bar indicate 40  $\mu$ M

Supplemental  
Figure 2

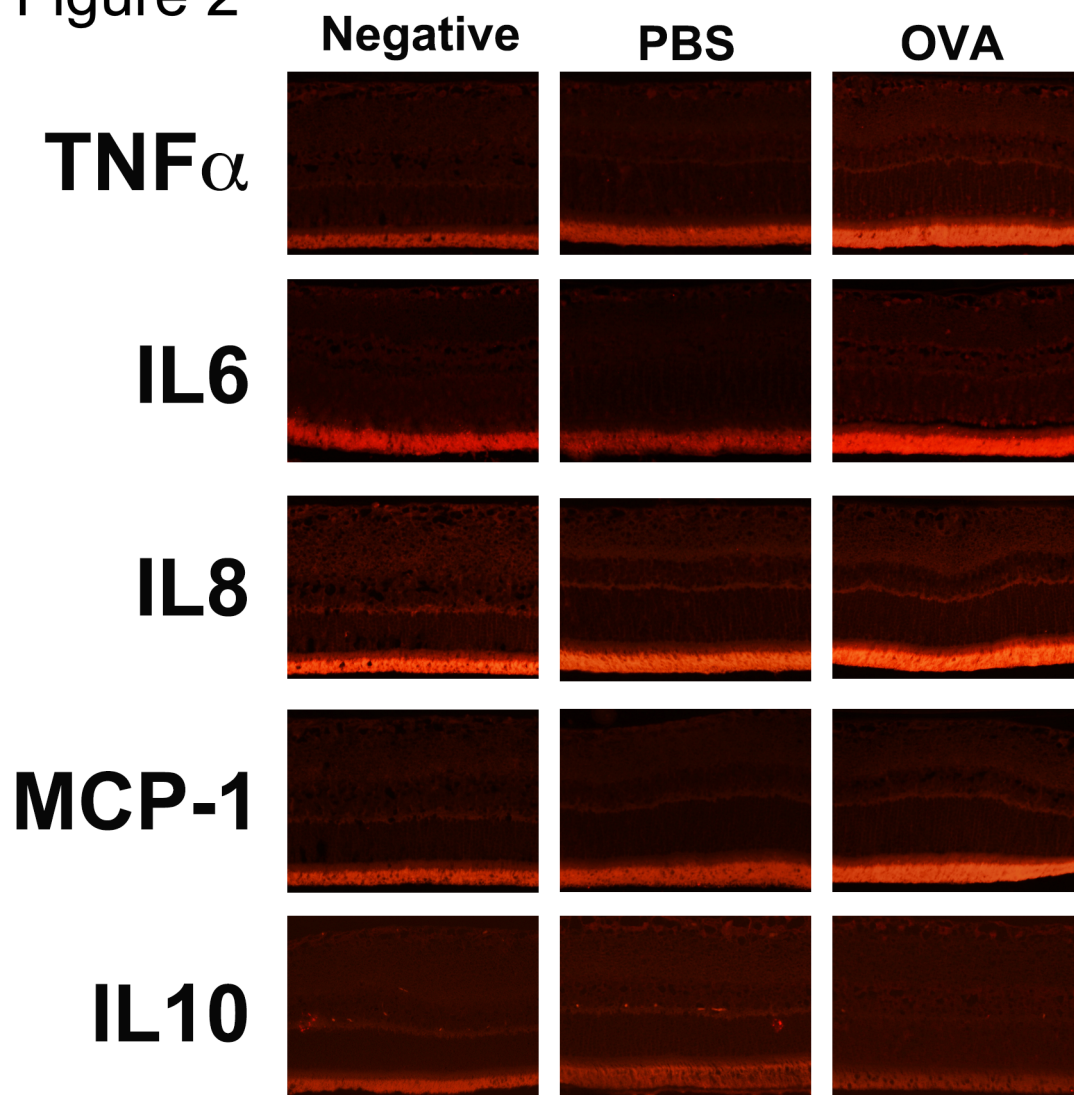

\* Scale bar indicate 40  $\mu$ M

Supplementary  
Figure 3

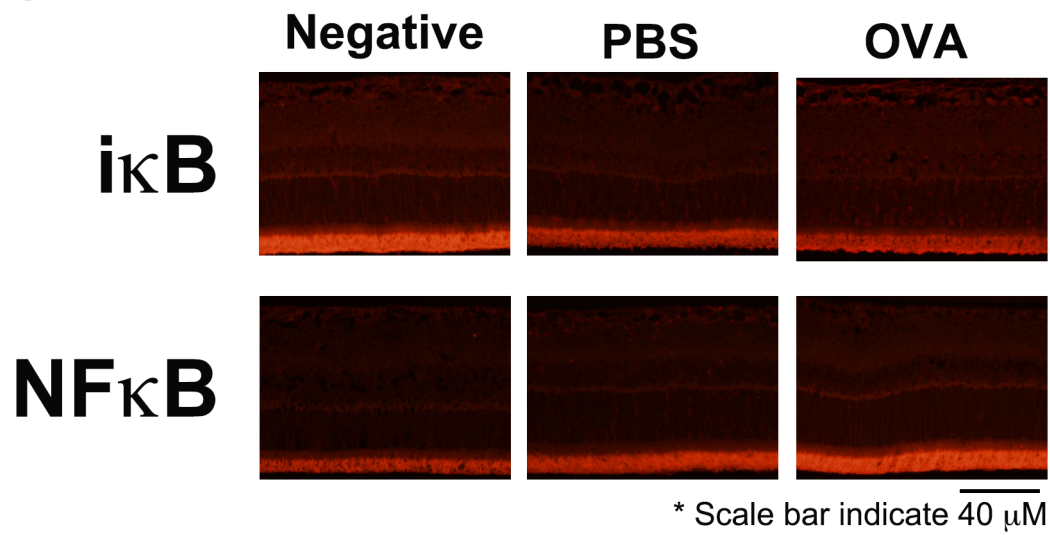

Supplement: mmc1.pdf [file mmc1.pdf]
